# Supplementary material for: ACPYPE - AnteChamber PYthon Parser interfacE
Source: PubMed Central journal article supplement (PMC3461484; doi:10.1186/1756-0500-5-367), 2012-07-23
Supplement: 1756-0500-5-367-S2.pdf [file 1756-0500-5-367-S2.pdf]

# A Comparative Test for ACPYPE

Running a testing routine, I used `pymol` to generate 22 pdb files. They are tripeptides of every usual amino acid residue including 2 variants for HIS. All peptides have N- and T- termini.

I used GROMACS 4.5 with all these tripeptides to generate topology files with AMBER99SB forcefield as reference.

OBS: peptides JJJ.pdb (Hip-Hip-Hip) and RRR.pdb (Arg-Arg-Arg): their net charge should be +3, but *gasteiger* method (the way how ACPYPE try to guess the net charge of the molecule if not given) failed to get the right value, instead it says it is 'Zero', for which SQM programme will fail to calculate the atomic partial charges. So be aware that ACPYPE may guess a wrong net charge when running it on your own molecule.

Next, I used ACPYPE to generate the topologies and parameters for these 22 entries and compare theirs results with the ones from GROMACS reference.

By using ACPYPE with option '-a amber' (which means `parm99.dat + gaff.dat + frcmod.ff99SB + frcmod.parmbsc0`), it seems to give better results than using just GAFF (the default option in ACPYPE) when comparing with GROMACS outputs, i.e., the former basically got almost all atom types and parameters identical to the GROMACS with AMBER99SB reference, while the latter missed just a few more.

A more detailed comparison between ACPYPE with option '-a amber' against GROMACS' AMBER99SB (including a Single Point Energy minimisation with GROMACS) results and it can be seen that they **match** except by:

## | *in terms of topology*

- entries HHH (Hie-Hie-Hie), JJJ (Hip-Hip-Hip), OOO (Hid-Hid-Hid), RRR (Arg-Arg-Arg) and WWW (Trp-Trp-Trp) have some improper dihedrals inverted;
- WWW which has 3 extra improper dihedrals related to atoms sharing in the 5-ring and 6-ring of the TRP. These improper dihedrals would be there in order to keep the planarity between 5-ring and 6-ring;
- YYY (Tyr-Tyr-Tyr) for which atom CZ (id 15, 36 and 57) got atom type CA instead of C in GROMACS.

## | *in terms of parameters*

- charges (can be either *gasteiger* or *bcc* with ACPYPE);
- YYY: 6 bonds and 9 dihedrals, all involving atom CZ (id 15, 36 and 57), because of atom type changing mentioned above;

When we look the bonded potential energies for all entries, the difference is no bigger than 0.002% (even for the entries with inverted improper dihedrals) with one solely exception: YYY with 1.9%, because of the atom type change seen above.

The source code for these tests can be seen [here](#).

See detailed output [here](#)

usePymol: True, ffType: amber, cType: gas

File AAA.pdb : residue ALA

Compare ACPYPE x GMX AMBER99SB topol & param

==> Comparing atomtypes AC x AMBER

atomtypes OK

==> Comparing pairs

pairs OK

==> Comparing bonds

bonds OK

==> Comparing angles

angles OK

==> Comparing dihedrals

dihedrals OK

Compare ACPYPE x GMX AMBER99SB Pot. Energy (|ERROR|%)

LJ-14 0.000

LJ\_(SR) 0.000

Coulomb-14 76.981 215.415000 x 935.821000

Coulomb\_(SR) 62.786 -387.017000 x -1039.970000

TotalNonBonded 42.492 -158.744190 x -91.291190

Potential 63.728 38.393100 x 105.849000

Angle 0.000

Bond 0.000

Proper\_Dih. 0.000

Improper\_Dih. 0.000

Dihedral P+I 0.000

Total\_Bonded 0.001

File CCC.pdb : residue CYS

Compare ACPYPE x GMX AMBER99SB topol & param

==> Comparing atomtypes AC x AMBER

atomtypes OK

==> Comparing pairs

pairs OK

==> Comparing bonds

bonds OK

==> Comparing angles

angles OK

==> Comparing dihedrals

dihedrals OK

Compare ACPYPE x GMX AMBER99SB Pot. Energy (|ERROR|%)

LJ-14 0.000

LJ\_(SR) 0.000

Coulomb-14 76.949 188.291000 x 816.834000

Coulomb\_(SR) 59.574 -342.955000 x -848.355000

TotalNonBonded 80.193 -153.559000 x -30.416000

Potential 72.553 46.585300 x 169.729000

Angle 0.000

Bond 0.000

Proper\_Dih. 0.000

Improper\_Dih. 0.000

Dihedral P+I 0.000

Total\_Bonded 0.000

File DDD.pdb : residue ASP

Compare ACPYPE x GMX AMBER99SB topol & param

==> Comparing atomtypes AC x AMBER

atomtypes OK

==> Comparing pairs

```

    pairs OK
==> Comparing bonds
    bonds OK
==> Comparing angles
    angles OK
==> Comparing dihedrals
    dihedrals OK
Compare ACPYPE x GMX AMBER99SB Pot. Energy (|ERROR|%)
    LJ-14      0.000
    LJ_(SR)    0.000
    Coulomb-14 98.557    20.689000 x 1434.240000
    Coulomb_(SR) 152.312    413.830000 x -791.079000
TotalNonBonded 32.568    432.001700 x 640.643700
    Potential  24.480    643.643000 x 852.282000
    Angle      0.000
    Bond       0.000
    Proper_Dih. 0.000
    Improper_Dih. 0.000
    Dihedral P+I 0.000
    Total_Bonded 0.001

```

File EEE.pdb : residue GLU

```

Compare ACPYPE x GMX AMBER99SB topol & param
==> Comparing atomtypes AC x AMBER
    atomtypes OK
==> Comparing pairs
    pairs OK
==> Comparing bonds
    bonds OK
==> Comparing angles
    angles OK
==> Comparing dihedrals
    dihedrals OK
Compare ACPYPE x GMX AMBER99SB Pot. Energy (|ERROR|%)
    LJ-14      0.000
    LJ_(SR)    0.000
    Coulomb-14 84.382    146.496000 x 937.969000
    Coulomb_(SR) 113.598    54.962600 x -404.192000
TotalNonBonded 61.892    204.617700 x 536.936100
    Potential  42.278    453.717000 x 786.037000
    Angle      0.000
    Bond       0.000
    Proper_Dih. 0.000
    Improper_Dih. 0.000
    Dihedral P+I 0.000
    Total_Bonded 0.001

```

File FFF.pdb : residue PHE

```

Compare ACPYPE x GMX AMBER99SB topol & param
==> Comparing atomtypes AC x AMBER
    atomtypes OK
==> Comparing pairs
    pairs OK
==> Comparing bonds
    bonds OK
==> Comparing angles
    angles OK
==> Comparing dihedrals
    dihedrals OK
Compare ACPYPE x GMX AMBER99SB Pot. Energy (|ERROR|%)

```

|                |        |             |                |
|----------------|--------|-------------|----------------|
| LJ-14          | 0.000  |             |                |
| LJ_(SR)        | 0.000  |             |                |
| Coulomb-14     | 78.357 | 182.820000  | x 844.711000   |
| Coulomb_(SR)   | 63.253 | -377.329000 | x -1026.840000 |
| TotalNonBonded | 7.267  | -170.350100 | x -157.970100  |
| Potential      | 16.913 | 60.805000   | x 73.182000    |
| Angle          | 0.000  |             |                |
| Bond           | 0.000  |             |                |
| Proper_Dih.    | 0.000  |             |                |
| Improper_Dih.  | 0.000  |             |                |
| Dihedral P+I   | 0.000  |             |                |
| Total_Bonded   | 0.001  |             |                |

File GGG.pdb : residue GLY

Compare ACPYPE x GMX AMBER99SB topol & param

==> Comparing atomtypes AC x AMBER

atomtypes OK

==> Comparing pairs

pairs OK

==> Comparing bonds

bonds OK

==> Comparing angles

angles OK

==> Comparing dihedrals

dihedrals OK

Compare ACPYPE x GMX AMBER99SB Pot. Energy (|ERROR|%)

|                |        |             |               |
|----------------|--------|-------------|---------------|
| LJ-14          | 0.000  |             |               |
| LJ_(SR)        | 0.000  |             |               |
| Coulomb-14     | 73.451 | 173.346000  | x 652.926000  |
| Coulomb_(SR)   | 61.248 | -357.586000 | x -922.746000 |
| TotalNonBonded | 34.100 | -165.389450 | x -250.969450 |
| Potential      | 58.507 | 146.272000  | x 60.692400   |
| Angle          | 0.000  |             |               |
| Bond           | 0.000  |             |               |
| Proper_Dih.    | 0.000  |             |               |
| Improper_Dih.  | 0.000  |             |               |
| Dihedral P+I   | 0.000  |             |               |
| Total_Bonded   | 0.000  |             |               |

File HHH.pdb : residue HIE

Compare ACPYPE x GMX AMBER99SB topol & param

==> Comparing atomtypes AC x AMBER

atomtypes OK

==> Comparing pairs

pairs OK

==> Comparing bonds

bonds OK

==> Comparing angles

angles OK

==> Comparing dihedrals

dihedrals OK

Compare ACPYPE x GMX AMBER99SB Pot. Energy (|ERROR|%)

|                |        |             |                |
|----------------|--------|-------------|----------------|
| LJ-14          | 0.000  |             |                |
| LJ_(SR)        | 0.000  |             |                |
| Coulomb-14     | 81.888 | 173.302000  | x 956.861000   |
| Coulomb_(SR)   | 69.494 | -348.907000 | x -1143.720000 |
| TotalNonBonded | 5.514  | -192.836000 | x -204.090000  |
| Potential      | 3.084  | 365.312000  | x 354.047000   |
| Angle          | 0.000  |             |                |
| Bond           | 0.001  |             |                |

```

    Proper_Dih.    0.000
  Improper_Dih.   1.532    0.898273 x 0.884509
    Dihedral P+I   0.014
    Total_Bonded  0.002
('IDIH: Amb diff Acp', ['10 13 11 12', '23 26 32 27', '26 30 32 33', '27
30 28 29', '40 43 49 44', '43 47 49 50', '44 47 45 46', '6 9 15 10', '9
13 15 16'])
('IDIH: Acp diff Amb', ['12 13 11 10', '23 32 26 27', '26 33 32 30', '29
30 28 27', '40 49 43 44', '43 50 49 47', '46 47 45 44', '6 15 9 10', '9
16 15 13'])

```

File III.pdb : residue ILE

Compare ACPYPE x GMX AMBER99SB topol & param

==> Comparing atomtypes AC x AMBER

atomtypes OK

==> Comparing pairs

pairs OK

==> Comparing bonds

bonds OK

==> Comparing angles

angles OK

==> Comparing dihedrals

dihedrals OK

Compare ACPYPE x GMX AMBER99SB Pot. Energy (|ERROR|%)

LJ-14 0.000

LJ\_(SR) 0.000

Coulomb-14 69.230 199.075000 x 646.988000

Coulomb\_(SR) 58.412 -354.812000 x -853.159000

TotalNonBonded 24.390 -156.344000 x -206.778000

Potential 35.203 143.271000 x 92.835900

Angle 0.000

Bond 0.000

Proper\_Dih. 0.000

Improper\_Dih. 0.000

Dihedral P+I 0.000

Total\_Bonded 0.000

File JJJ.pdb : residue HIP

Compare ACPYPE x GMX AMBER99SB topol & param

==> Comparing atomtypes AC x AMBER

atomtypes OK

==> Comparing pairs

pairs OK

==> Comparing bonds

bonds OK

==> Comparing angles

angles OK

==> Comparing dihedrals

dihedrals OK

Compare ACPYPE x GMX AMBER99SB Pot. Energy (|ERROR|%)

LJ-14 0.000

LJ\_(SR) 0.000

Coulomb-14 90.527 101.523000 x 1071.690000

Coulomb\_(SR) 69.386 -309.479000 x -94.742400

TotalNonBonded 123.848 -228.163800 x 956.739800

Potential 73.287 431.906000 x 1616.810000

Angle 0.000

Bond 0.000

Proper\_Dih. 0.000

Improper\_Dih. 0.461 1.165150 x 1.159780

```
Dihedral P+I    0.006
Total_Bonded    0.000
('IDIH: Amb diff Acp', ['10 14 12 13', '24 27 34 28', '27 32 34 35', '28
32 30 31', '42 45 52 46', '45 50 52 53', '46 50 48 49', '6 9 16 10', '9
14 16 17'])
('IDIH: Acp diff Amb', ['13 10 12 14', '24 34 27 28', '27 35 34 32', '31
28 30 32', '42 52 45 46', '45 53 52 50', '49 46 48 50', '6 16 9 10', '9
17 16 14'])
```

File KKK.pdb : residue LYS

Compare ACPYPE x GMX AMBER99SB topol & param

==> Comparing atomtypes AC x AMBER  
atomtypes OK

==> Comparing pairs  
pairs OK

==> Comparing bonds  
bonds OK

==> Comparing angles  
angles OK

==> Comparing dihedrals  
dihedrals OK

Compare ACPYPE x GMX AMBER99SB Pot. Energy (|ERROR|%)

|                |         |            |               |
|----------------|---------|------------|---------------|
| LJ-14          | 0.000   |            |               |
| LJ_(SR)        | 0.000   |            |               |
| Coulomb-14     | 74.108  | 339.525000 | x 1311.310000 |
| Coulomb_(SR)   | 103.779 | 23.481500  | x -621.413000 |
| TotalNonBonded | 47.224  | 365.320900 | x 692.211400  |
| Potential      | 34.840  | 611.384000 | x 938.277000  |
| Angle          | 0.000   |            |               |
| Bond           | 0.000   |            |               |
| Proper_Dih.    | 0.000   |            |               |
| Improper_Dih.  | 0.000   |            |               |
| Dihedral P+I   | 0.000   |            |               |
| Total_Bonded   | 0.001   |            |               |

File LLL.pdb : residue LEU

Compare ACPYPE x GMX AMBER99SB topol & param

==> Comparing atomtypes AC x AMBER  
atomtypes OK

==> Comparing pairs  
pairs OK

==> Comparing bonds  
bonds OK

==> Comparing angles  
angles OK

==> Comparing dihedrals  
dihedrals OK

Compare ACPYPE x GMX AMBER99SB Pot. Energy (|ERROR|%)

|                |         |             |                |
|----------------|---------|-------------|----------------|
| LJ-14          | 0.000   |             |                |
| LJ_(SR)        | 0.000   |             |                |
| Coulomb-14     | 74.848  | 186.743000  | x 742.452000   |
| Coulomb_(SR)   | 69.131  | -349.887000 | x -1133.470000 |
| TotalNonBonded | 58.805  | -159.631700 | x -387.505700  |
| Potential      | 173.384 | 96.444700   | x -131.425000  |
| Angle          | 0.000   |             |                |
| Bond           | 0.000   |             |                |
| Proper_Dih.    | 0.000   |             |                |
| Improper_Dih.  | 0.000   |             |                |
| Dihedral P+I   | 0.000   |             |                |
| Total_Bonded   | 0.002   |             |                |

File MMM.pdb : residue MET

Compare ACPYPE x GMX AMBER99SB topol & param

==> Comparing atomtypes AC x AMBER

atomtypes OK

==> Comparing pairs

pairs OK

==> Comparing bonds

bonds OK

==> Comparing angles

angles OK

==> Comparing dihedrals

dihedrals OK

Compare ACPYPE x GMX AMBER99SB Pot. Energy (|ERROR|%)

LJ-14 0.000

LJ\_(SR) 0.000

Coulomb-14 76.769 198.587000 x 854.851000

Coulomb\_(SR) 65.492 -351.183000 x -1017.690000

TotalNonBonded 6.061 -158.745400 x -168.988400

Potential 15.269 67.102100 x 56.856000

Angle 0.000

Bond 0.001

Proper\_Dih. 0.000

Improper\_Dih. 0.000

Dihedral P+I 0.000

Total\_Bonded 0.001

File NNN.pdb : residue ASN

Compare ACPYPE x GMX AMBER99SB topol & param

==> Comparing atomtypes AC x AMBER

atomtypes OK

==> Comparing pairs

pairs OK

==> Comparing bonds

bonds OK

==> Comparing angles

angles OK

==> Comparing dihedrals

dihedrals OK

Compare ACPYPE x GMX AMBER99SB Pot. Energy (|ERROR|%)

LJ-14 0.000

LJ\_(SR) 0.000

Coulomb-14 91.472 23.449900 x 274.966000

Coulomb\_(SR) 70.875 -405.220000 x -1391.320000

TotalNonBonded 65.275 -390.779400 x -1125.363300

Potential 93.657 -49.749900 x -784.336000

Angle 0.001

Bond 0.000

Proper\_Dih. 0.000

Improper\_Dih. 0.000

Dihedral P+I 0.000

Total\_Bonded 0.001

File OOO.pdb : residue HID

Compare ACPYPE x GMX AMBER99SB topol & param

==> Comparing atomtypes AC x AMBER

atomtypes OK

==> Comparing pairs

pairs OK

==> Comparing bonds

```
bonds OK
==> Comparing angles
angles OK
==> Comparing dihedrals
dihedrals OK
Compare ACPYPE x GMX AMBER99SB Pot. Energy (|ERROR|%)
  LJ-14      0.000
  LJ_(SR)    0.000
  Coulomb-14 79.204   141.251000 x 679.208000
  Coulomb_(SR) 67.748  -314.460000 x -975.015000
  TotalNonBonded 40.869  -177.377900 x -299.975900
  Potential   24.679   496.783000 x 374.182000
  Angle      0.000
  Bond       0.000
  Proper_Dih. 0.000
  Improper_Dih. 0.209   1.048090 x 1.045900
  Dihedral P+I 0.002
  Total_Bonded 0.000
('IDIH: Amb diff Acp', ['10 14 12 13', '23 26 32 27', '26 31 32 33', '27
31 29 30', '40 43 49 44', '43 48 49 50', '44 48 46 47', '6 9 15 10', '9
14 15 16'])
('IDIH: Acp diff Amb', ['13 10 12 14', '23 32 26 27', '26 33 32 31', '30
27 29 31', '40 49 43 44', '43 50 49 48', '47 44 46 48', '6 15 9 10', '9
16 15 14'])
```

File PPP.pdb : residue PRO

```
Compare ACPYPE x GMX AMBER99SB topol & param
==> Comparing atomtypes AC x AMBER
atomtypes OK
==> Comparing pairs
pairs OK
==> Comparing bonds
bonds OK
==> Comparing angles
angles OK
==> Comparing dihedrals
dihedrals OK
Compare ACPYPE x GMX AMBER99SB Pot. Energy (|ERROR|%)
  LJ-14      0.000
  LJ_(SR)    0.000
  Coulomb-14 73.364   218.006000 x 818.454000
  Coulomb_(SR) 55.847  -313.270000 x -709.513000
  TotalNonBonded 172.715  -85.972800 x 118.232200
  Potential    30.996   454.618000 x 658.824000
  Angle      0.000
  Bond       0.000
  Proper_Dih. 0.000
  Improper_Dih. 0.000
  Dihedral P+I 0.000
  Total_Bonded 0.000
```

File QQQ.pdb : residue GLN

```
Compare ACPYPE x GMX AMBER99SB topol & param
==> Comparing atomtypes AC x AMBER
atomtypes OK
==> Comparing pairs
pairs OK
==> Comparing bonds
bonds OK
==> Comparing angles
```



```
angles OK
==> Comparing dihedrals
dihedrals OK
Compare ACPYPE x GMX AMBER99SB Pot. Energy (|ERROR|%)
  LJ-14      0.000
  LJ_(SR)    0.000
  Coulomb-14 184.660   104.048000 x -88.087400
  Coulomb_(SR) 53.699   -396.819000 x -857.046000
  TotalNonBonded 69.174   -290.715400 x -943.077800
  Potential  123.577   124.461000 x -527.902000
  Angle      0.000
  Bond       0.001
  Proper_Dih. 0.000
  Improper_Dih. 0.000
  Dihedral P+I 0.000
  Total_Bonded 0.000
```

File RRR.pdb : residue ARG

Compare ACPYPE x GMX AMBER99SB topol & param

==> Comparing atomtypes AC x AMBER

atomtypes OK

==> Comparing pairs

pairs OK

==> Comparing bonds

bonds OK

==> Comparing angles

angles OK

==> Comparing dihedrals

dihedrals OK

Compare ACPYPE x GMX AMBER99SB Pot. Energy (|ERROR|%)

```
  LJ-14      0.000
  LJ_(SR)    0.000
  Coulomb-14 82.729   -504.705000 x -2922.250000
  Coulomb_(SR) 44.608   772.922000 x 1395.370000
  TotalNonBonded 117.425   266.374400 x -1528.722600
  Potential  145.008   557.173000 x -1237.930000
  Angle      0.000
  Bond       0.001
  Proper_Dih. 0.000
  Improper_Dih. 1.900   0.359230 x 0.352406
  Dihedral P+I 0.012
  Total_Bonded 0.002
```

('IDIH: Amb diff Acp', ['12 17 15 16', '36 41 39 40', '60 65 63 64'])

('IDIH: Acp diff Amb', ['17 12 15 16', '41 36 39 40', '65 60 63 64'])

File SSS.pdb : residue SER

Compare ACPYPE x GMX AMBER99SB topol & param

==> Comparing atomtypes AC x AMBER

atomtypes OK

==> Comparing pairs

pairs OK

==> Comparing bonds

bonds OK

==> Comparing angles

angles OK

==> Comparing dihedrals

dihedrals OK

Compare ACPYPE x GMX AMBER99SB Pot. Energy (|ERROR|%)

LJ-14 0.000

LJ\_(SR) 0.000

|                |        |             |   |             |
|----------------|--------|-------------|---|-------------|
| Coulomb-14     | 49.075 | 193.833000  | x | 380.621000  |
| Coulomb_(SR)   | 51.509 | -278.751000 | x | -574.856000 |
| TotalNonBonded | 58.465 | -77.661300  | x | -186.978300 |
| Potential      | 88.782 | 123.129000  | x | 13.812000   |
| Angle          | 0.000  |             |   |             |
| Bond           | 0.001  |             |   |             |
| Proper_Dih.    | 0.000  |             |   |             |
| Improper_Dih.  | 0.000  |             |   |             |
| Dihedral P+I   | 0.000  |             |   |             |
| Total_Bonded   | 0.000  |             |   |             |

File TTT.pdb : residue THR

Compare ACPYPE x GMX AMBER99SB topol & param

==> Comparing atomtypes AC x AMBER

atomtypes OK

==> Comparing pairs

pairs OK

==> Comparing bonds

bonds OK

==> Comparing angles

angles OK

==> Comparing dihedrals

dihedrals OK

Compare ACPYPE x GMX AMBER99SB Pot. Energy (|ERROR|%)

LJ-14 0.000

LJ\_(SR) 0.000

Coulomb-14 166.024 135.605000 x -205.387000

Coulomb\_(SR) 29.208 -339.284000 x -479.267000

TotalNonBonded 70.431 -201.923900 x -682.898900

Potential 105.054 23.138000 x -457.837000

Angle 0.000

Bond 0.001

Proper\_Dih. 0.000

Improper\_Dih. 0.000

Dihedral P+I 0.000

Total\_Bonded 0.000

File VVV.pdb : residue VAL

Compare ACPYPE x GMX AMBER99SB topol & param

==> Comparing atomtypes AC x AMBER

atomtypes OK

==> Comparing pairs

pairs OK

==> Comparing bonds

bonds OK

==> Comparing angles

angles OK

==> Comparing dihedrals

dihedrals OK

Compare ACPYPE x GMX AMBER99SB Pot. Energy (|ERROR|%)

LJ-14 0.000

LJ\_(SR) 0.000

Coulomb-14 6.013 195.043000 x 207.522000

Coulomb\_(SR) 46.468 -353.881000 x -661.068000

TotalNonBonded 65.080 -158.129200 x -452.837200

Potential 142.174 87.421000 x -207.287000

Angle 0.000

Bond 0.000

Proper\_Dih. 0.000

Improper\_Dih. 0.000

```
Dihedral P+I    0.000
Total_Bonded    0.000
```

File WWW.pdb : residue TRP

Compare ACPYPE x GMX AMBER99SB topol & param

```
==> Comparing atomtypes AC x AMBER
atomtypes OK
```

```
==> Comparing pairs
pairs OK
```

```
==> Comparing bonds
bonds OK
```

```
==> Comparing angles
angles OK
```

```
==> Comparing dihedrals
```

```
('  ac: ', [[16, 24, 15, 13, 4, 180.0, 4.602, 2.0], [40, 48, 39, 37, 4,
180.0, 4.602, 2.0], [64, 72, 63, 61, 4, 180.0, 4.602, 2.0]])
```

Compare ACPYPE x GMX AMBER99SB Pot. Energy (|ERROR|%)

```
LJ-14    0.000
```

```
LJ_(SR)  0.000
```

```
Coulomb-14  77.500    227.454000 x 1010.900000
```

```
Coulomb_(SR)  60.345   -430.220000 x -1084.920000
```

```
TotalNonBonded  61.207   -210.345000 x -81.599000
```

```
Potential    52.058   118.566000 x 247.309000
```

```
Angle       0.000
```

```
Bond        0.000
```

```
Proper_Dih.  0.000
```

```
Improper_Dih.  0.598    0.190516 x 0.189376
```

```
Dihedral P+I  0.002
```

```
Total_Bonded  0.001
```

```
('IDIH: Amb diff Acp', ['10 14 12 13', '14 17 15 16', '33 36 34 35', '34
38 36 37', '38 41 39 40', '57 60 58 59', '58 62 60 61', '62 65 63 64', '9
12 10 11'])
```

```
('IDIH: Acp diff Amb', ['14 10 12 13', '15 23 14 12', '17 14 15 16', '33
35 34 36', '38 34 36 37', '39 47 38 36', '41 38 39 40', '57 59 58 60',
'62 58 60 61', '63 71 62 60', '65 62 63 64', '9 11 10 12'])
```

File YYY.pdb : residue TYR

Compare ACPYPE x GMX AMBER99SB topol & param

```
==> Comparing atomtypes AC x AMBER
```

```
15 CZ AC: CA    x    AMB: C
```

```
36 CZ AC: CA    x    AMB: C
```

```
57 CZ AC: CA    x    AMB: C
```

```
==> Comparing pairs
pairs OK
```

```
==> Comparing bonds
```

```
('  ac: ', [[13, 15, 1, 0.14, 392460.0], [13, 15, 1, 0.141, 392460.0],
[15, 18, 1, 0.14, 392460.0], [15, 18, 1, 0.141, 392460.0], [34, 36, 1,
0.14, 392460.0], [34, 36, 1, 0.141, 392460.0], [36, 39, 1, 0.14,
392460.0], [36, 39, 1, 0.141, 392460.0], [55, 57, 1, 0.14, 392460.0],
[55, 57, 1, 0.141, 392460.0], [57, 60, 1, 0.14, 392460.0], [57, 60, 1,
0.141, 392460.0]])
```

```
==> Comparing angles
angles OK
```

```
==> Comparing dihedrals
```

```
('  ac: ', [[13, 15, 16, 17, 9, 180.0, 9.623, 2.0], [17, 16, 15, 18, 9,
180.0, 3.766, 2.0], [18, 15, 16, 17, 9, 180.0, 9.623, 2.0], [34, 36, 37,
38, 9, 180.0, 9.623, 2.0], [38, 37, 36, 39, 9, 180.0, 3.766, 2.0], [39,
36, 37, 38, 9, 180.0, 9.623, 2.0], [55, 57, 58, 59, 9, 180.0, 9.623,
2.0], [59, 58, 57, 60, 9, 180.0, 3.766, 2.0], [60, 57, 58, 59, 9, 180.0,
9.623, 2.0]])
```

```
Compare ACPYPE x GMX AMBER99SB Pot. Energy (|ERROR|%)
  LJ-14      0.000
  LJ_(SR)    0.000
  Coulomb-14 78.850   146.778000 x 693.988000
  Coulomb_(SR) 66.753  -367.937000 x -1106.690000
  TotalNonBonded 49.296  -197.017700 x -388.560700
  Potential  121.680   151.870000 x -32.925800
  Angle      0.000
  Bond       0.967   215.247000 x 217.349000
  Proper_Dih. 7.765   55.205700 x 59.853100
  Improper_Dih. 0.000
  Dihedral P+I 7.749   55.323112 x 59.970512
  Total_Bonded 1.897   348.887700 x 355.634900
```
