# Supplementary material for: ACPYPE - AnteChamber PYthon Parser interfacE
Source: PubMed Central journal article supplement (PMC3461484; doi:10.1186/1756-0500-5-367), 2012-07-23

1iku

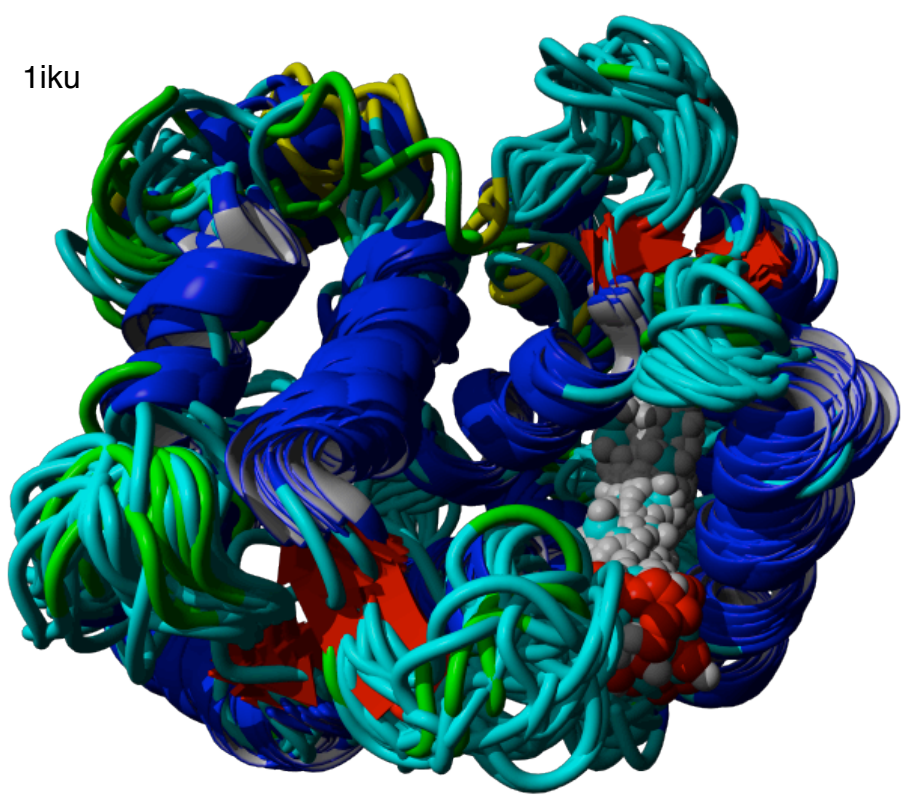

2k0g

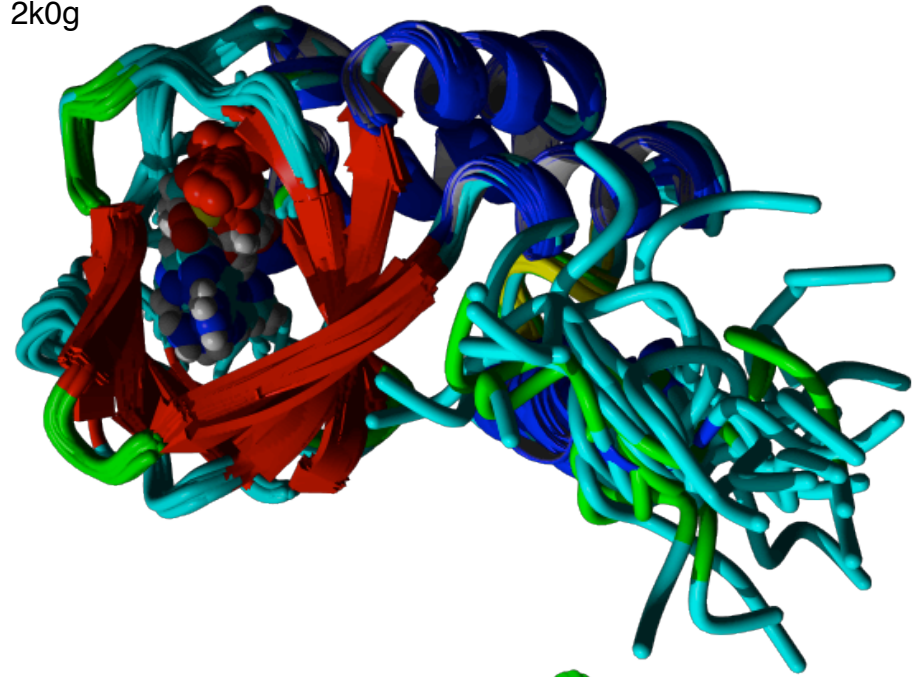

2jn3

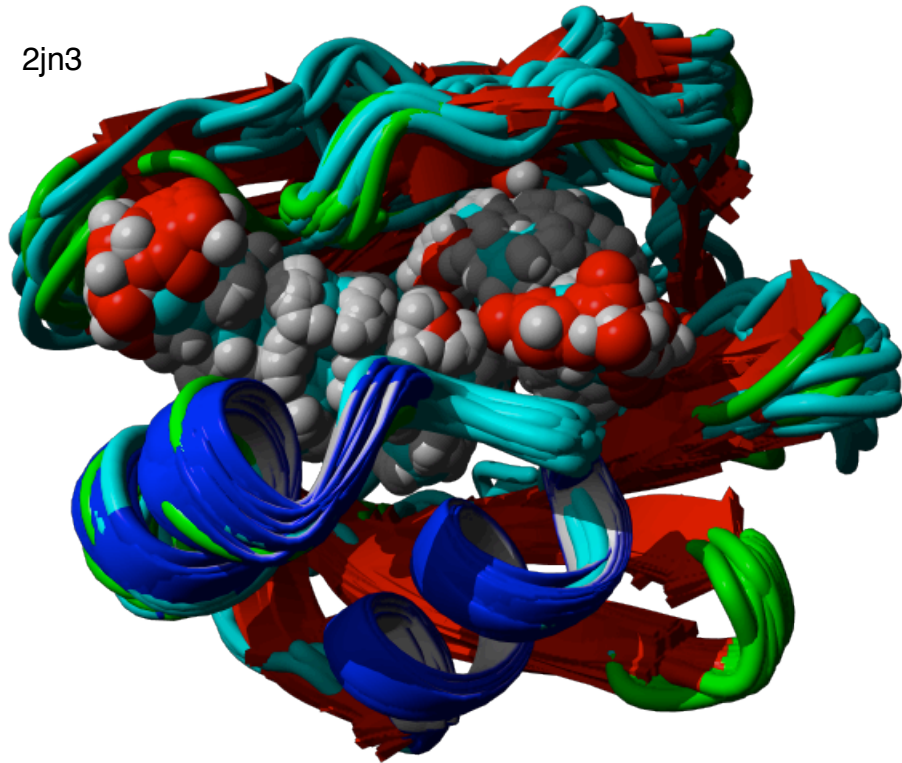

1jkn

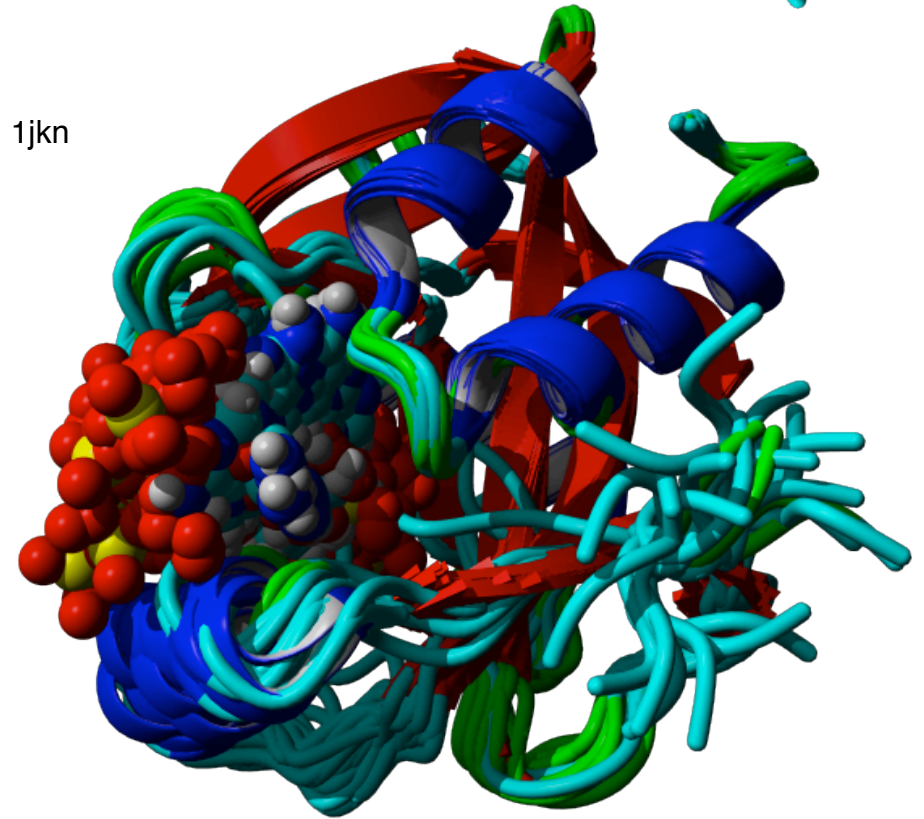

Supplement: 1756-0500-5-367-S4.pdf [file 1756-0500-5-367-S4.pdf]
